# Supplementary material for: Tuning surface redox chemistry through trace Ni doping in cobalt pyrophosphate (Co 2 P 2 O 7 ) for high-performance supercapacitors: experimental and theoretical insights
Source: Royal Society of Chemistry journal article supplement (doi:10.1039/d5ta09303a), 2026-01-01
Supplement: d5ta09303a1.pdf [file d5ta09303a1.pdf]

**Tuning surface redox chemistry through trace Ni doping in Cobalt  
Pyrophosphate( $\text{Co}_2\text{P}_2\text{O}_7$ ) for high-performance supercapacitors:  
Experimental and theoretical insights**

Kismat K Sahoo,<sup>a, #</sup> Abhisek Padhy,<sup>a, #</sup> Ashutosh Sahoo<sup>a</sup> and J. N. Behera<sup>a\*</sup>

*<sup>a</sup>School of Chemical Sciences, National Institute of Science Education and Research (NISER), An OCC of Homi Bhabha National Institute (HBNI), Khordha, Bhubaneswar 752050, Odisha, India.*

*<sup>b</sup>Centre for Interdisciplinary Sciences (CIS), NISER, Jatni, Khurda, Bhubaneswar 752050, Odisha, India.*

\*Email: [jnbehera@niser.ac.in](mailto:jnbehera@niser.ac.in)

## 1 Electrochemical measurement: (SP300 workstation)

Electrochemical measurements were conducted in a three-electrode configuration with 3M KOH as the electrolyte. A Hg/HgO (3M KOH) electrode served as the reference, while a Pt wire acted as the counter electrode. The working electrode was prepared via the drop-casting method: 8 mg of the as-prepared GC@Co<sub>0.9</sub>Ni<sub>0.1</sub>P<sub>2</sub>O<sub>7</sub> sample was mixed with 1 mg of PVDF (as a polymeric binder) and 1 mg of carbon black. The mixture was thoroughly ground using a mortar and pestle with 200 µL of ethanol and dried at room temperature. This procedure was repeated three times to ensure a homogeneous blend.

Subsequently, 2 mg of the resulting mixture was dispersed in 35 µL of DMF in an Eppendorf vial and subjected to ultrasonication for 15 minutes. The dispersed solution was then used as an ink, and was drop-casted onto a graphite sheet with an active area of 1 × 1 cm<sup>2</sup>, yielding a total catalyst loading of 1.5 mg.

For electrochemical measurements, cyclic voltammetry (CV) was performed within a potential window of 0 to 0.5 V vs. Hg/HgO, running at various scan rates. Galvanostatic charge-discharge (GCD) measurements were carried out at current densities ranging from 1.5 to 10 A g<sup>-1</sup>. Additionally, electrochemical impedance spectroscopy (EIS) was performed using an AC voltage with a frequency range of 200 kHz to 0.01 Hz at open circuit potential (OCP, E = 0.0 V).

The specific Capacitance ( $C_{sp}$ ) (Fig-1) was measured from both CV and GCD techniques.

From CV curve by using the following mathematical formula (Equation 1)

$$C_{sp} = \frac{\int I(V) dV}{2m \Delta V \left(\frac{dV}{dt}\right)} \dots \dots \dots (1)$$

Where,  $\int I(V) dV$  denotes integrated CV area,  $(dV/dt)$  as CV scan rate (mVs<sup>-1</sup>), I is associated to the discharge current (A), m is the total mass of as prepared ink loaded in the working electrode (mg), &  $\Delta V$ , designates operational voltage window (V).

Further, the  $C_{sp}$  calculated by GCD techniques with the mathematical formula Shown below (Equations 2)

$$C_{sp} = \frac{I\Delta t}{m\Delta V} \dots \dots \dots (2)$$

I denote the current (A) used to perform the GCD test.

## 2. Hybrid Device Construction:

A hybrid device was constructed using two electrodes set up. Herein, rGO (AC) and electrochemically activated Ni<sub>60</sub>Co<sub>40</sub> 600 material are considered as negative and positive electrodes respectively. The final mass loading of the electrodes was optimized by the charge mass balance equation following (Equation 5)

$$m_{+}/m_{-} = C_{+}V_{+}/C_{-}V_{-} \text{ -----(3)}$$

Where,  $m_{+}$ ,  $m_{-}$  are the mass loading,  $C_{+}$ ,  $C_{-}$  are specific capacitance (F g<sup>-1</sup>) &  $V_{+}$ ,  $V_{-}$  are the individual operational voltage window of the positive and negative electrodes, respectively.

The energy density (E) & Power density (P) of the hybrid device were measured by following the mathematical formula (Eq. 4 & 5 respectively)

$$E = \frac{C_{sp}\Delta V^2}{2} \frac{1000}{3600} \dots \dots \dots (4)$$

$$P = \frac{E}{\Delta t} \dots \dots \dots (5)$$

Where  $C_{sp}$  denotes specific capacitance (Fg<sup>-1</sup>),  $\Delta V$  is the operational voltage window, and  $\Delta t$  is the discharge time of the pseudocapacitor. E, P indicate energy density (Whkg<sup>-1</sup>) and power density (Wkg<sup>-1</sup>), respectively.

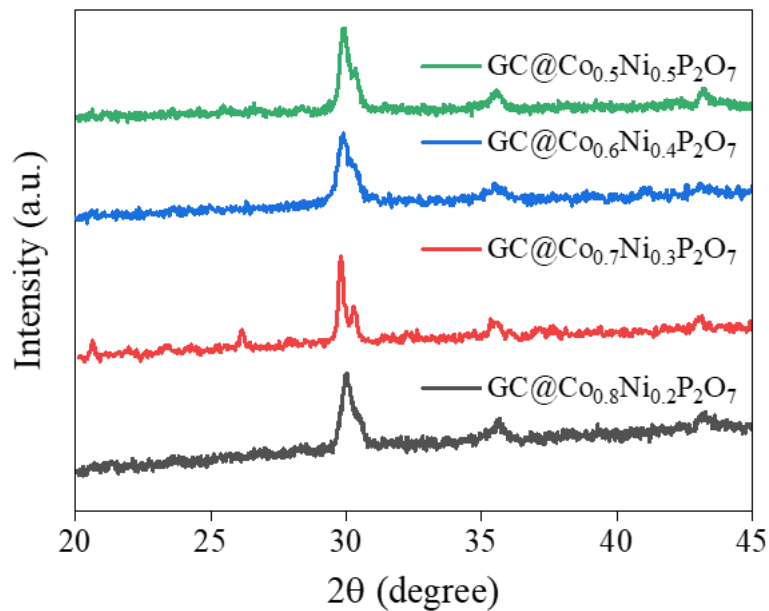

**Figure S1.** PXRD of other pyrophosphate variants

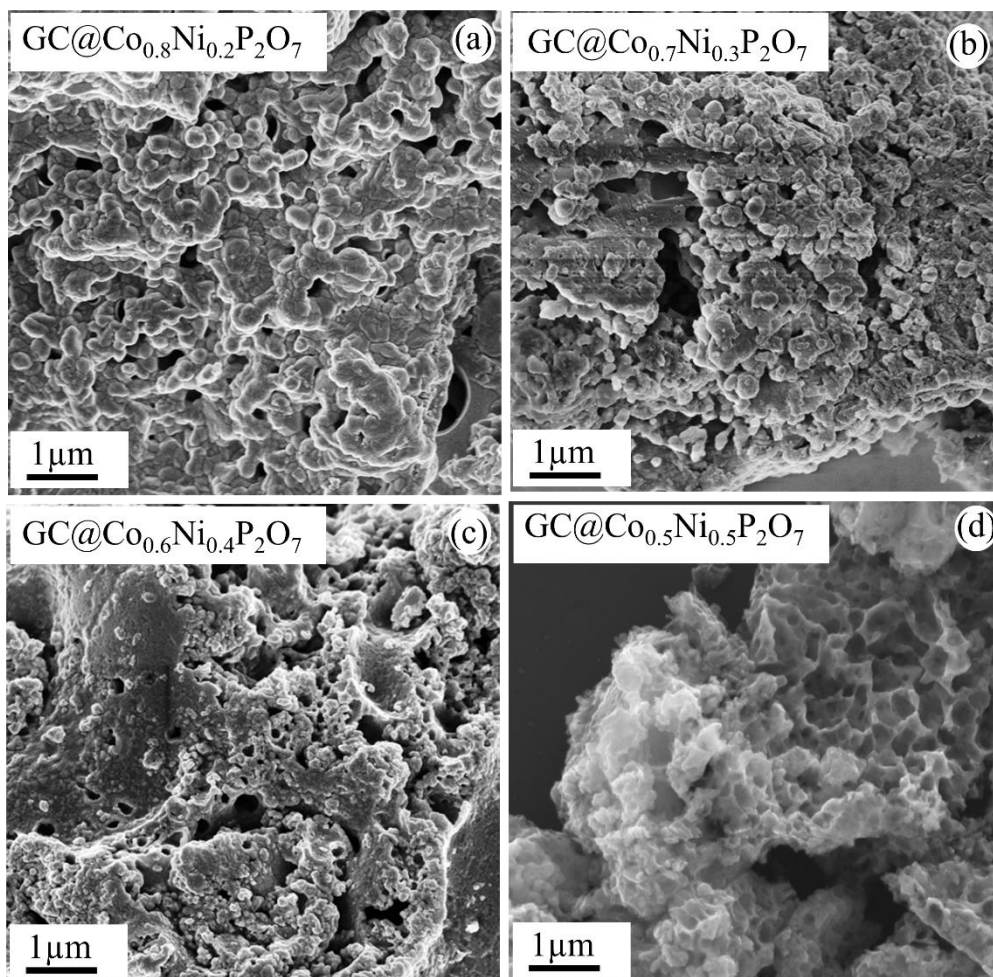

**Figure S2.** FE-SEM images of (a) GC@Co<sub>0.8</sub>Ni<sub>0.2</sub>P<sub>2</sub>O<sub>7</sub>, (b) GC@Co<sub>0.7</sub>Ni<sub>0.3</sub>P<sub>2</sub>O<sub>7</sub>, (c) GC@Co<sub>0.6</sub>Ni<sub>0.4</sub>P<sub>2</sub>O<sub>7</sub>, (d) GC@Co<sub>0.5</sub>Ni<sub>0.5</sub>P<sub>2</sub>O<sub>7</sub>

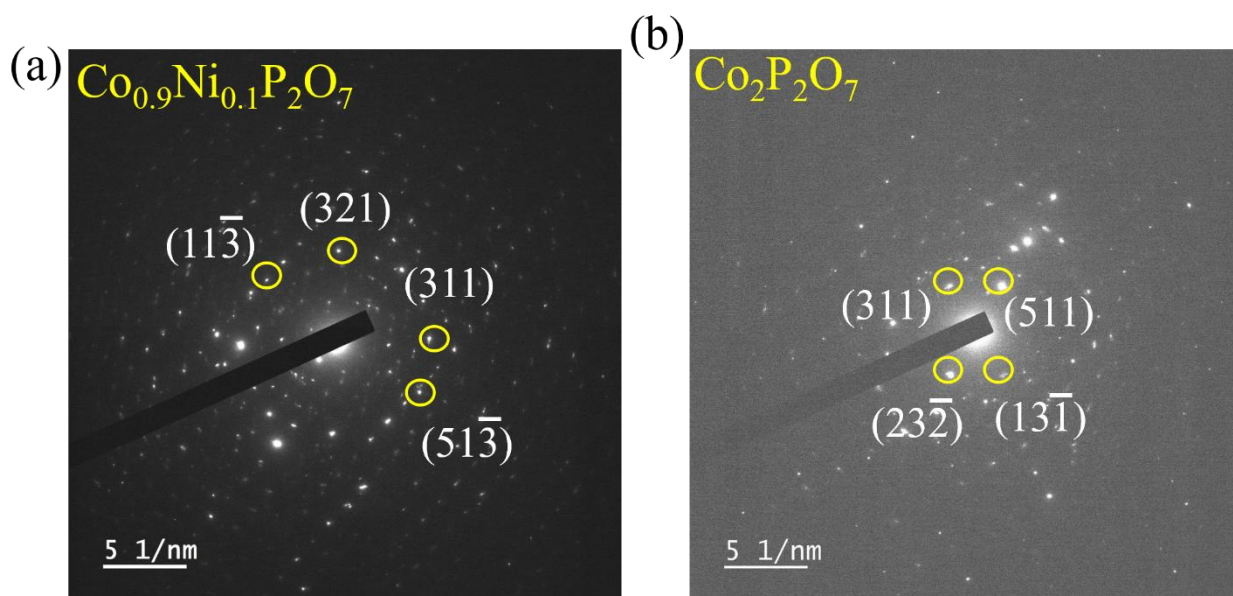

**Figure S3** SAED pattern of (a)  $\text{GC@Co}_{0.9}\text{Ni}_{0.1}\text{P}_2\text{O}_7$ , (b)  $\text{GC@Co}_2\text{P}_2\text{O}_7$

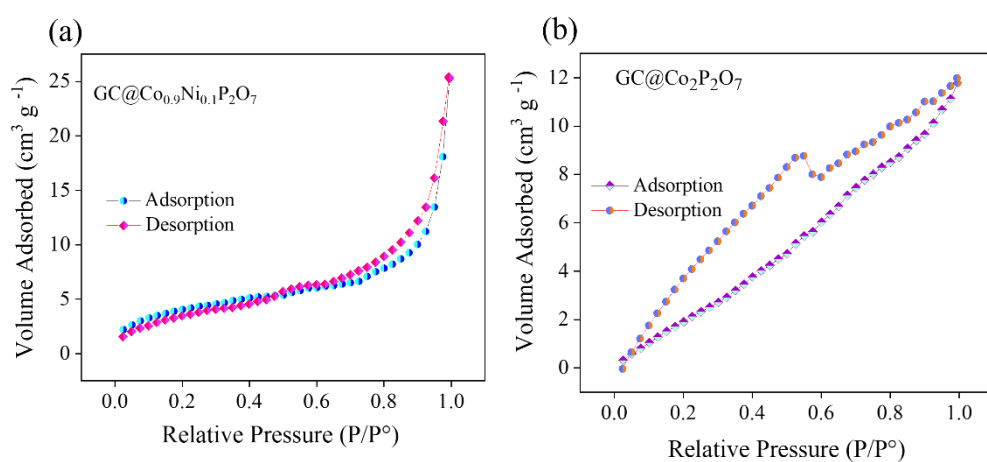

**Figure S4.** Adsorption/desorption isotherm for (a)  $\text{GC@Co}_{0.9}\text{Ni}_{0.1}\text{P}_2\text{O}_7$ , (b)  $\text{GC@Co}_2\text{P}_2\text{O}_7$

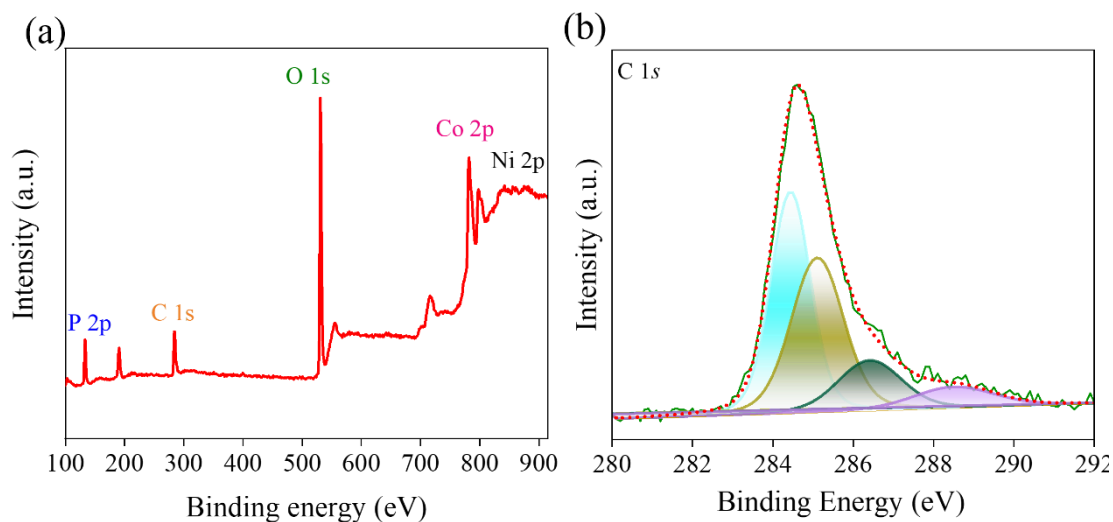

**Figure S5.** (a) Full survey spectrum of GC@Co<sub>0.9</sub>Ni<sub>0.1</sub>P<sub>2</sub>O<sub>7</sub> and (b) deconvolution of C1s

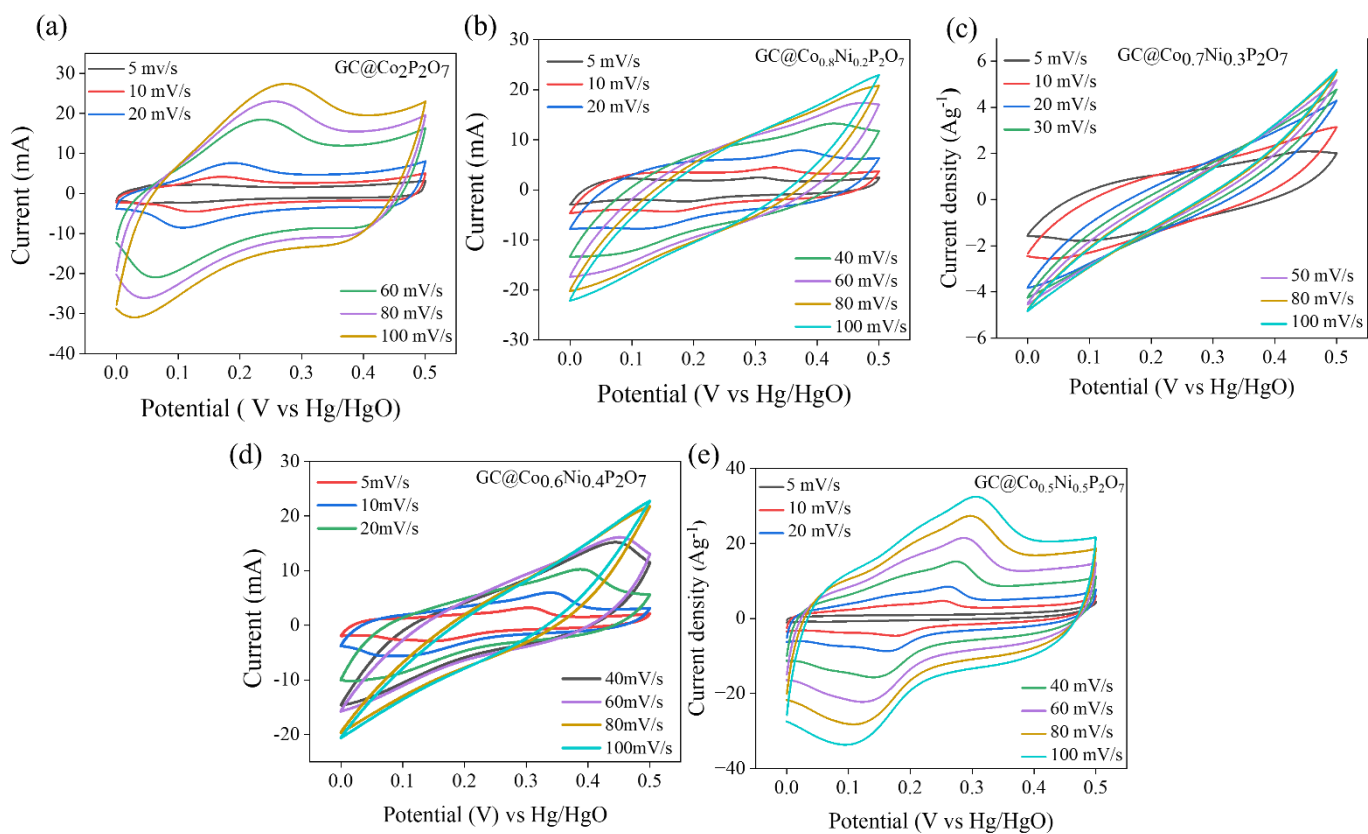

**Figure S6.** Cyclic voltammograms of (a) GC@Co<sub>2</sub>P<sub>2</sub>O<sub>7</sub>, (b) GC@Co<sub>0.8</sub>Ni<sub>0.2</sub>P<sub>2</sub>O<sub>7</sub>, (c) GC@Co<sub>0.7</sub>Ni<sub>0.3</sub>P<sub>2</sub>O<sub>7</sub>, (d) GC@Co<sub>0.6</sub>Ni<sub>0.4</sub>P<sub>2</sub>O<sub>7</sub>, (e) GC@Co<sub>0.5</sub>Ni<sub>0.5</sub>P<sub>2</sub>O<sub>7</sub>

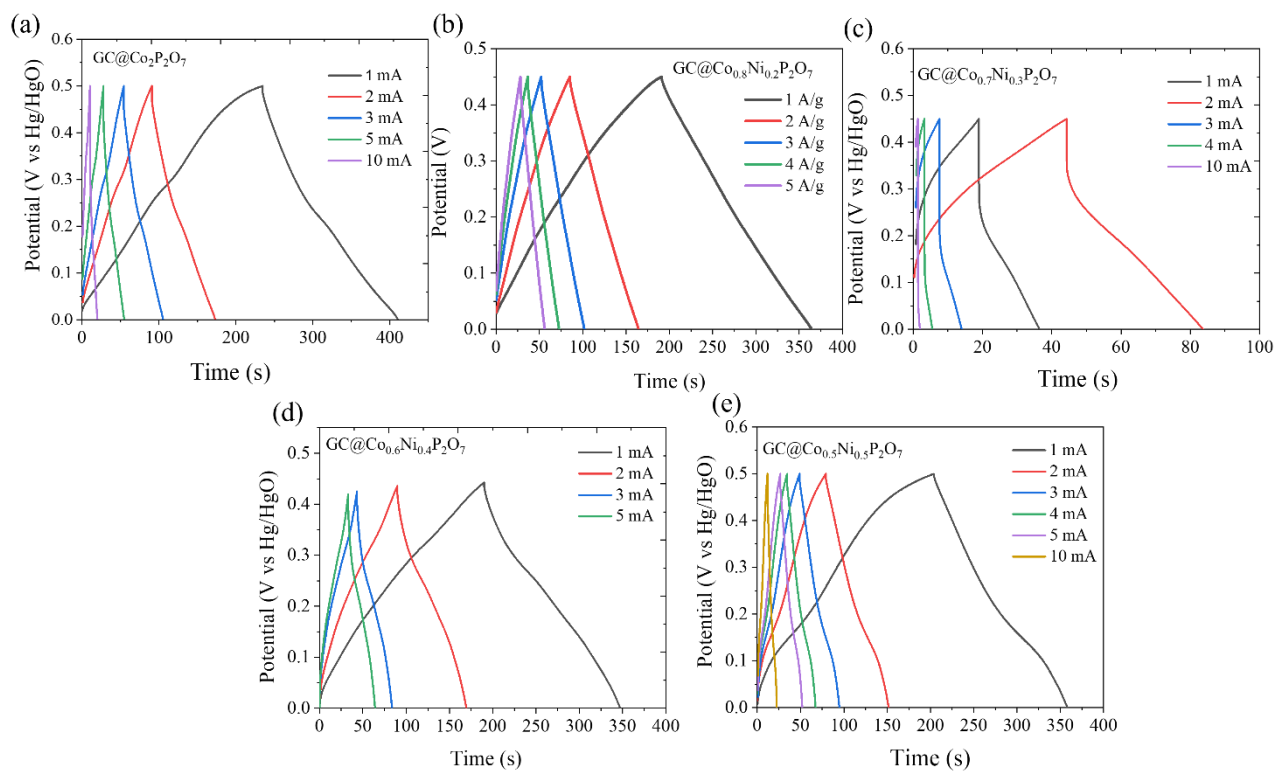

**Figure S7** GCD profiles of remaining variants

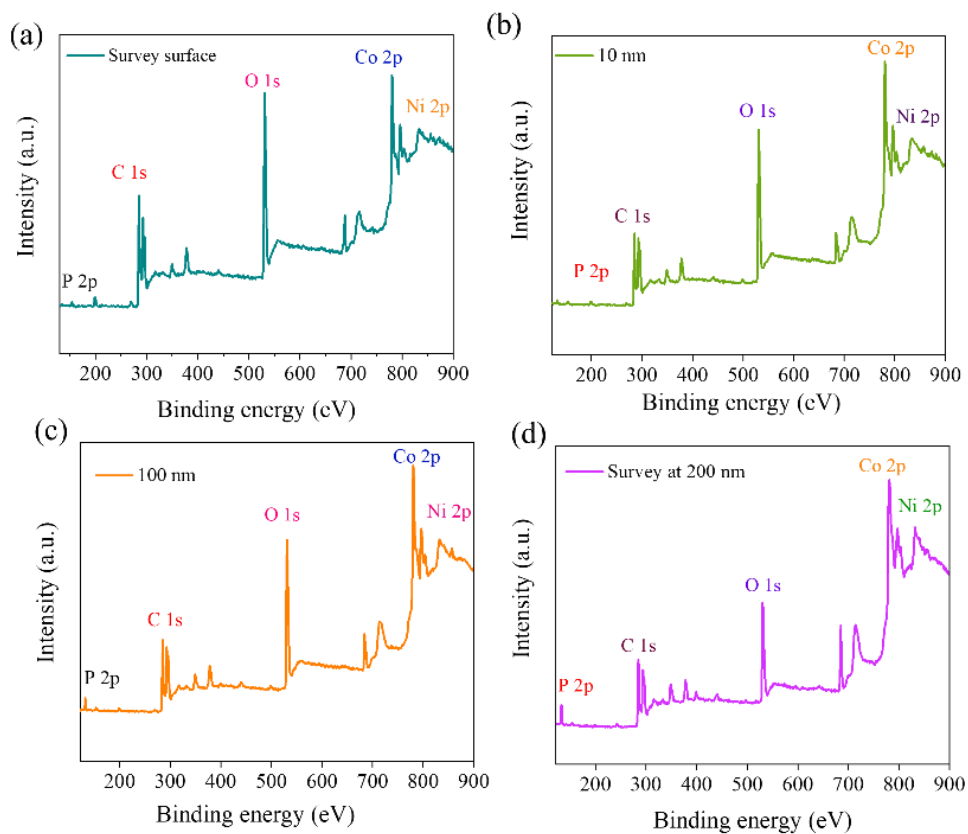

**Figure S8** Survey of GC@Co<sub>0.9</sub>Ni<sub>0.1</sub>P<sub>2</sub>O<sub>7</sub> at different depths.

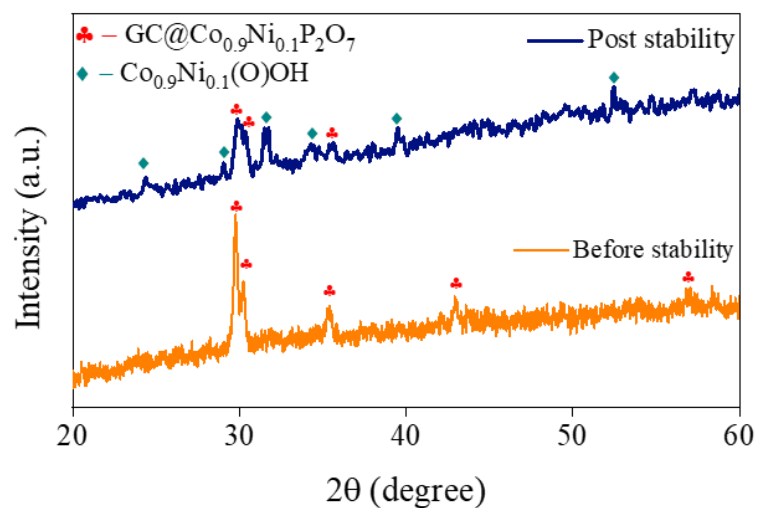

**Figure S9** PXRD of before and post stability for GC@Co<sub>0.9</sub>Ni<sub>0.1</sub>P<sub>2</sub>O<sub>7</sub>



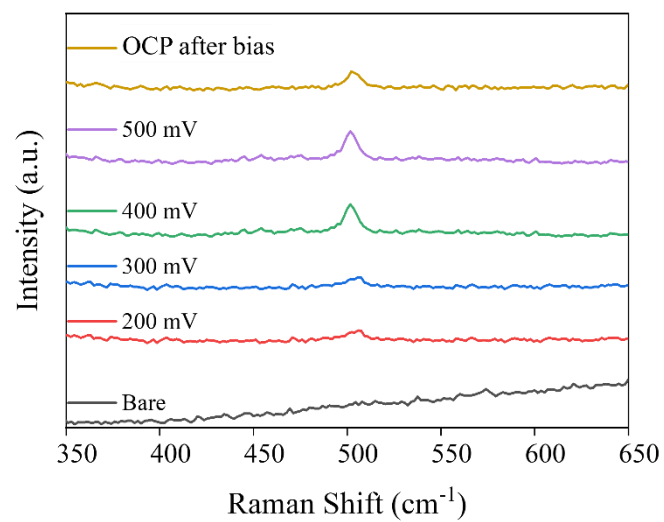

**Figure S10.** In-situ RAMAN study of as synthesized GC@Co<sub>0.9</sub>Ni<sub>0.1</sub>P<sub>2</sub>O<sub>7</sub>

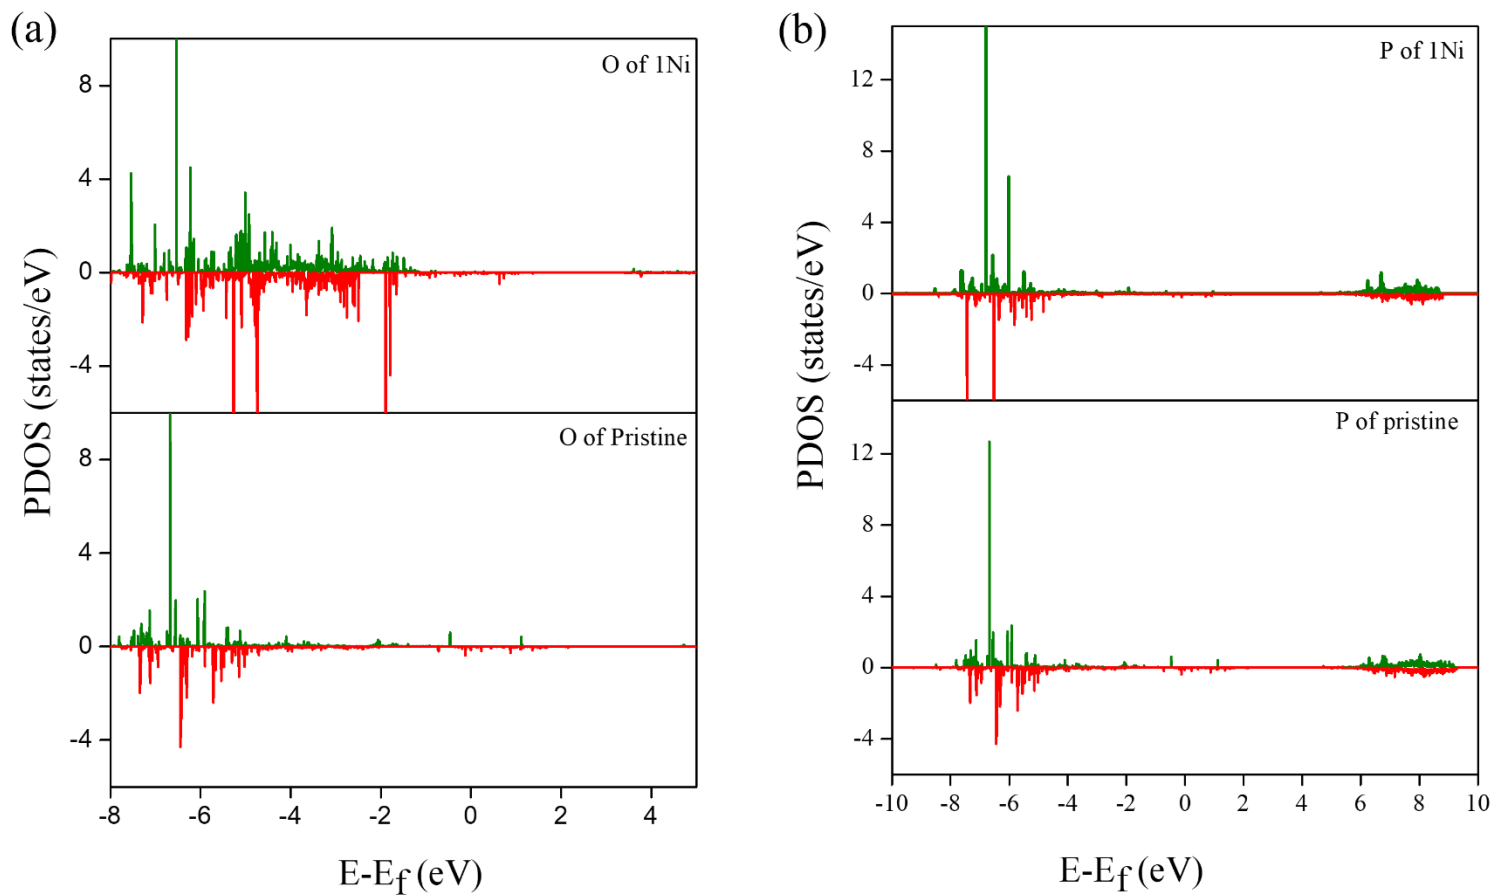

**Figure S11** PDOS analysis of O (a) and P (b) in both pristine and 1Ni  $\text{Co}_2\text{P}_2\text{O}_7$

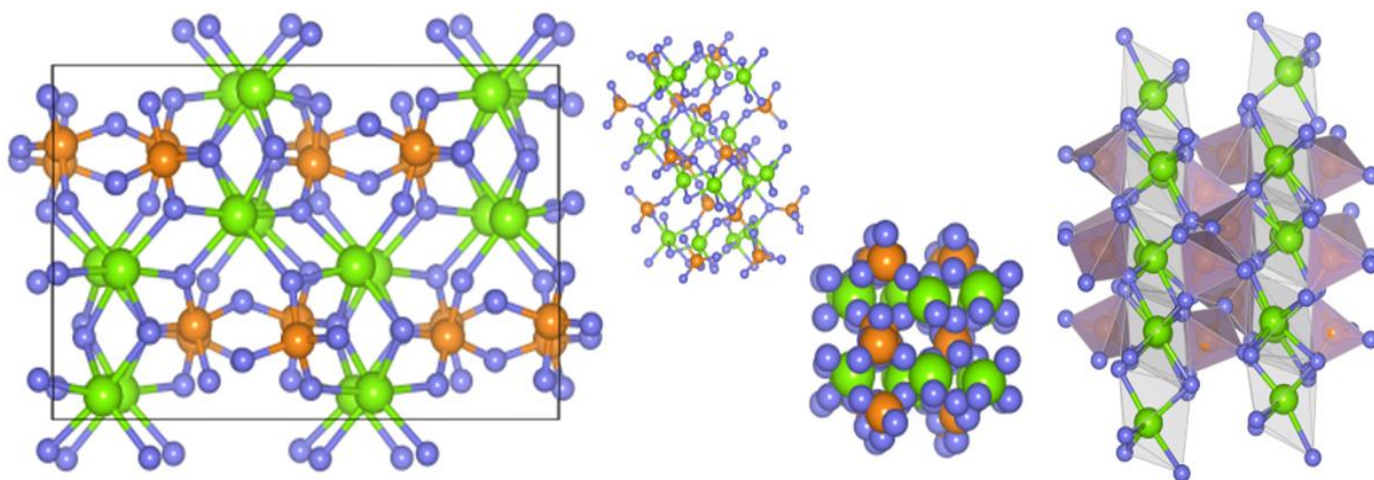

**Figure S12** Different views of bulk  $\text{Co}_2\text{P}_2\text{O}_7$  where green color refers to Co orange refers to Phosphorous and purple shows Oxygen

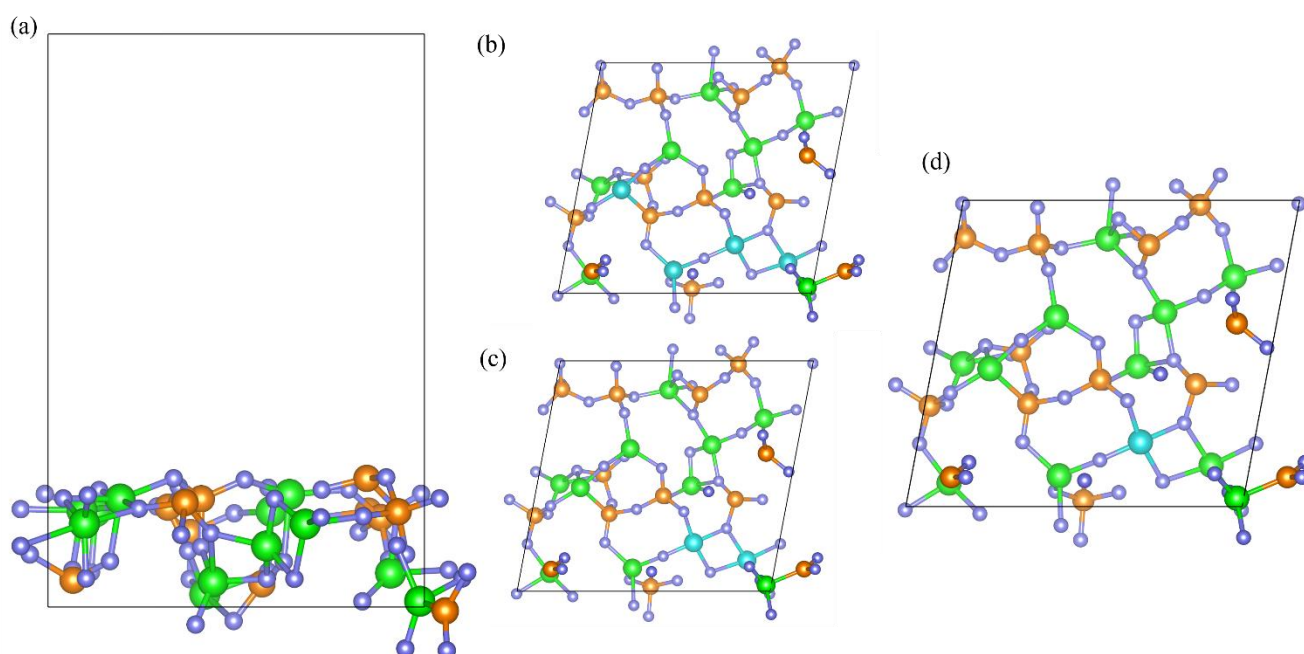

**Figure S13** 022 surface of different species where a is for Pristine (b) 2Ni, (c) 4Ni and (d) refers to 1Ni here green color refers to Co, orange refers to Phosphorous, purple shows Oxygen and cyan

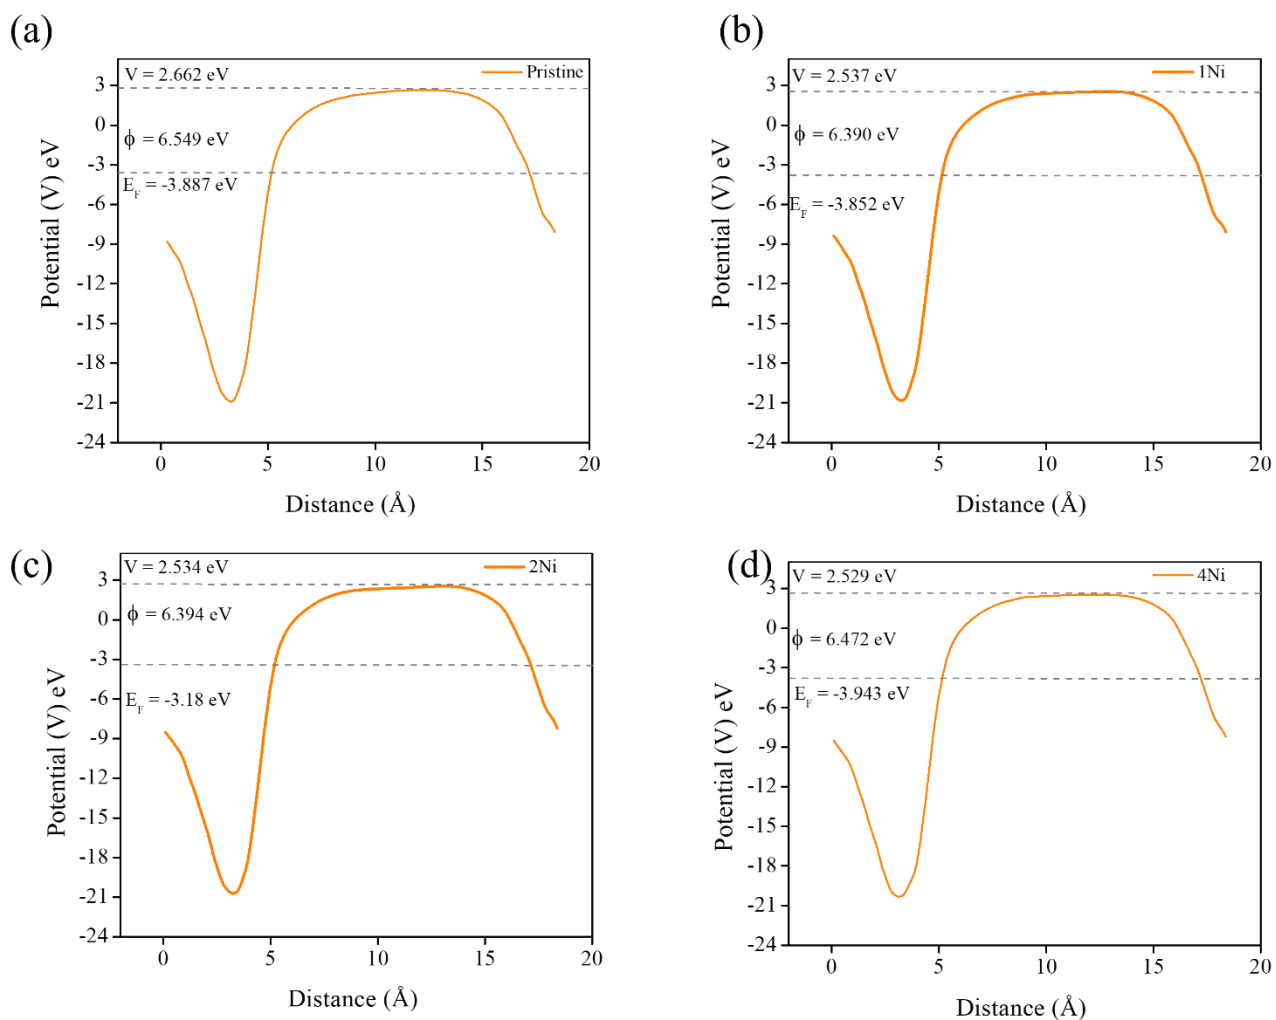

**Figure S14** work function plots for each specie, such as (a) for pristine, (b) for 1Ni, (c) for 2Ni (d) for 4Ni

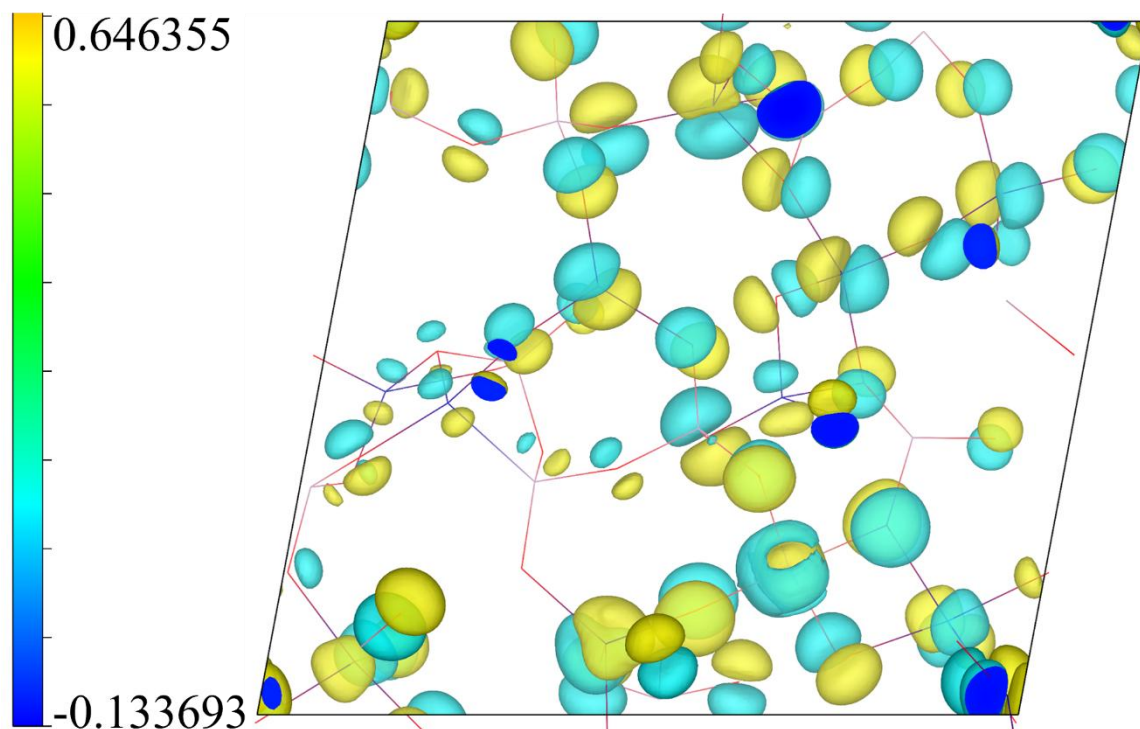

**Figure S15.** Charge density difference (CDD) plot produced by subtracting pristine from 1 Ni doped Co<sub>2</sub>P<sub>2</sub>O<sub>7</sub> where blue is negligible electron

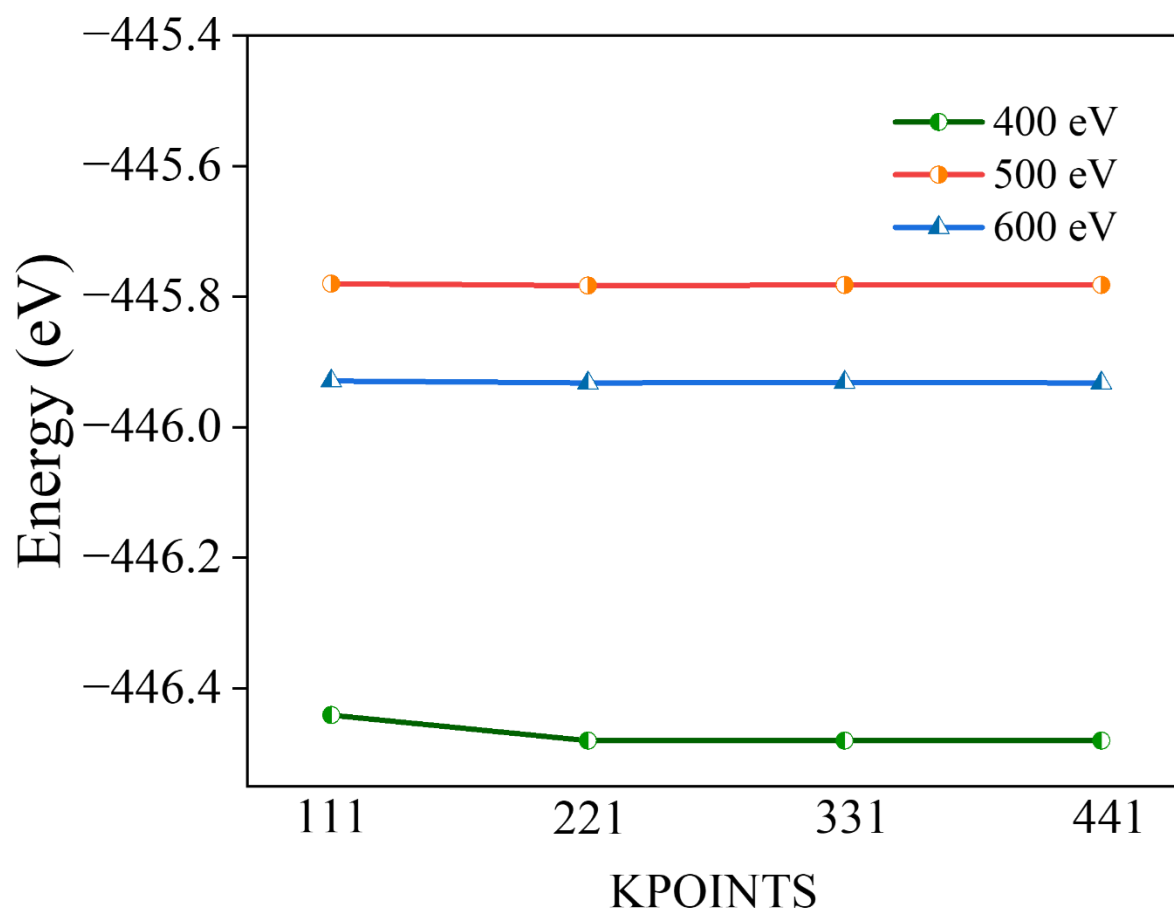

**Figure S16.** KPOINTS and ENCUT convergence test

**Table S1** Bader analysis of the material before and after incorporation of 1Ni

| Sample                                     | Average $e^-$<br>on Co | Average $e^-$<br>on P | Average $e^-$<br>on O | Observation                                                                                                                       |
|--------------------------------------------|------------------------|-----------------------|-----------------------|-----------------------------------------------------------------------------------------------------------------------------------|
| Pristine $\text{Co}_2\text{P}_2\text{O}_7$ | 7.59                   | 0.685                 | 7.634                 | Baseline charge distribution without dopant influence.                                                                            |
| 1Ni $\text{Co}_2\text{P}_2\text{O}_7$      | 7.58                   | 0.688                 | 7.658                 | Slight decrease in Co charge implies higher oxidation; electron accumulation on P and O centres indicates Co–O bond polarization. |

**Table S2:** Summary of XPS fitting constraints used for  $\text{GC}@_{\text{Co}_{0.9}\text{Ni}_{0.1}\text{P}_2\text{O}_7}$ 

| Parameter                                    | Co 2p                                        | Ni 2p                                        | P2p                                          | O1s                      |
|----------------------------------------------|----------------------------------------------|----------------------------------------------|----------------------------------------------|--------------------------|
| Software                                     | CasaXPS                                      | CasaXPS                                      | CasaXPS                                      | CasaXPS                  |
| Background                                   | Shirley                                      | Shirley                                      | Shirley                                      | Shirley                  |
| Peak shape                                   | Gaussian–Lorentzian (GL)                     | Gaussian–Lorentzian (GL)                     | Gaussian–Lorentzian (GL)                     | Gaussian–Lorentzian (GL) |
| Spin orbit splitting                         | ~15.0–15.9 eV<br>( $2p_{3/2}$ – $2p_{1/2}$ ) | ~17.2–17.8 eV<br>( $2p_{3/2}$ – $2p_{1/2}$ ) | ~0.84–0.88 eV<br>( $2p_{3/2}$ – $2p_{1/2}$ ) | -----                    |
| Area ratio<br>$2p_{3/2} : 2p_{1/2}$          | Fixed at 2:1                                 | Fixed at 2:1                                 | Fixed at 2:1                                 | -----                    |
| FWHM constraints                             | Same FWHM for each doublet                   | Same FWHM for each doublet                   | Same FWHM doublet                            | Independent components   |
| Satellite peaks                              | Included (~5–6 eV above main peak)           | Included (~5–6 eV above main peak)           | -----                                        | -----                    |
| Same constraints used for pristine and cycle | yes                                          | yes                                          | yes                                          | yes                      |
|                                              |                                              |                                              |                                              |                          |

**Table S3:** Depth-resolved XPS atomic ratios for GC@Co<sub>0.9</sub>Ni<sub>0.1</sub>P<sub>2</sub>O<sub>7</sub>

| Sample condition | Sputtering depth | P/Co atomic ratio |
|------------------|------------------|-------------------|
| Before cycling   | Surface          | ~1:1              |
| After cycling    | Surface          | ~0.07             |
| After cycling    | 10nm             | ~0.5              |
| After cycling    | 100nm            | ~1:1              |
| After cycling    | 200nm            | ~1:1              |

Table S4: Comparison table for phosphate-based material.

| Name                                                                                                             | Specific Capacitance                                | Potential window | Specific Capacitance of ASC                              | Energy density (In Wh kg <sup>-1</sup> ) | Power density (In W kg <sup>-1</sup> ) | Capacitance retention & Cycle No.s                 | Ref.      |
|------------------------------------------------------------------------------------------------------------------|-----------------------------------------------------|------------------|----------------------------------------------------------|------------------------------------------|----------------------------------------|----------------------------------------------------|-----------|
| Na Doped Ni <sub>2</sub> P <sub>2</sub> O <sub>7</sub>                                                           | 557 Fg <sup>-1</sup><br>(at 1.2 A g <sup>-1</sup> ) | 0 – 0.42 V       | 32.6 mFcm <sup>-2</sup><br>(at 0.5 mA cm <sup>-2</sup> ) | 23.4                                     | 1292.2                                 | 97.3% retention after 1000 cycles                  | 1         |
| Amorphous Co <sub>0.2</sub> Ni <sub>0.8</sub> polyphosphate                                                      | 1259 F/g<br>at 1.5 A/g<br>(3M KOH)                  | 0 – 0.55 V       | 119 F/g<br>at 1 A/g                                      | 42.4                                     | 800                                    | 80% retention after 2000 cycles (Device)           | 2         |
| Ni <sub>3</sub> P <sub>2</sub> O <sub>8</sub> - Co <sub>3</sub> P <sub>2</sub> O <sub>8</sub> .8H <sub>2</sub> O | 1974 F/g<br>at 0.5 A/g<br>(6M KOH)                  | 0 – 0.4 V        | 94 F/g at 0.5 A/g                                        | 33.4                                     | 399                                    | 83% retention after 5000 cycles (Device)           | 3         |
| Co <sub>0.4</sub> Ni <sub>1.6</sub> P <sub>2</sub> O <sub>7</sub> /Ndoped graphene (NG) composites               | 1473 F/g<br>at 1 A/g<br>(3M KOH)                    | 0 – 0.55 V       | -                                                        | 34.9                                     | 800                                    | 70% retention after 5000 cycles (device)           | 4         |
| sodium doped Ni <sub>2</sub> P <sub>2</sub> O <sub>7</sub> -Co <sub>2</sub> P <sub>2</sub> O <sub>7</sub>        | 295.2 Cg <sup>-1</sup><br>at 2 A/g<br>(3 M KOH)     | 0 – 0.45 V       | -                                                        | 54.1                                     | 1700                                   | 95% retention after 2000 cycles (device)           | 5         |
| Ni <sub>60</sub> Co <sub>40</sub> 600                                                                            | 566 Fg <sup>-1</sup><br>(at 1Ag <sup>-1</sup> )     | 0 – 0.65V        | 42 F g <sup>-1</sup>                                     | 18.79                                    | 15 965.2                               | 94% (up to 5000 cycles) & 84% (up to 10000 cycles) | 6         |
| Ni <sub>2</sub> P <sub>2</sub> O <sub>7</sub> (CTAB)                                                             | 250 Fg <sup>-1</sup><br>(at 2 Ag <sup>-1</sup> )    | -0.1–0.55V       | 70 F g <sup>-1</sup>                                     | 23                                       | 775                                    | 70% (4500 cycles) (device)                         | 7         |
| Co <sub>2</sub> P <sub>2</sub> O <sub>7</sub> with redox additive K <sub>3</sub> Fe(CN) <sub>6</sub>             | 580Fg <sup>-1</sup><br>(at 1Ag <sup>-1</sup> )      | -0.2–0.48V       | -                                                        | -                                        | -                                      | 96% (5000 cycles)                                  | 8         |
| Nickel doped carbon/cabalt pyrophosphate hybrid                                                                  | 490.196 F/g<br>at 1.5 A/g (3 M KOH)                 | 0 – 0.5 V        | 55.55 F/g at 1 A/g                                       | 26.23                                    | 1859.22                                | 80% retention after 10,000 cycles (device)         | This work |



## References:

1. M. Haghani and S. Daneshpazhuh, *J. Environ. Anal. Chem.*, **2020**, 7, 273.
2. L. Hou, L. Lian, D. Li, J. Lin, G. Pan, L. Zhang, X. Zhang, Q. Zhang and C. Yuan, *RSC Adv.*, **2013**, 3, 21558–21562.
3. C. Chen, N. Zhang, Y. He, B. Liang, R. Ma and X. Liu, *ACS Appl. Mater. Interfaces*, **2016**, 8, 23114–23121.
4. M. Pramanik, R. R. Salunkhe, M. Imura and Y. Yamauchi, *ACS Appl. Mater. Interfaces*, **2016**, 8, 9790–9797.
5. P. Sun, Z. Li, L. Zhang, C. Dong, Z. Li, H. Yao, J. Wang and G. Li, *J. Alloys Compd.*, **2018**, 750, 607–616.
6. A. Roy, H. R. Inta, S. Ghosh, H. V. S. R. M. Koppiseti, A. Mondal, B. R. Verma, S. Bag and V. Mahalingam, *J. Mater. Chem. A*, **2024**, 12, 4086–4098.
7. M. Priyadharshini, M. Sandhiya, M. Sathish, T. Pazhanivel, G. Mani, A. A. Alothman and K. N. Alqahtani, *J. Mater. Sci.: Mater. Electron.*, **2022**, 33, 9269–9276.
8. Z. Khan, B. Senthilkumar, S. Lim, R. Shanker, Y. Kim and H. Ko, *Adv. Mater. Interfaces*, **2017**, 4, 1700059.
